# Supplementary material
Source: publisher figshare collection journal article supplement (https://rs.figshare.com/ndownloader/files/16615409)
Supplement: Supplementary file 1 [file 16615409]

## Sheet: SVD_Aloe_data2017_prunedforsubm
Ind/Bout	Pollinator.Group	Pollinator	Pollen	Pistil.Exsertion (cm)
1	Bird Generalist	Bulbul	18	1.1
1	Bird Generalist	Bulbul	250	1.2
1	Bird Generalist	Bulbul	47	0.9
2	Bird Generalist	Bulbul	197	1.7
2	Bird Generalist	Bulbul	399	1.2
2	Bird Generalist	Bulbul	140	NA
2	Bird Generalist	Bulbul	372	1.8
2	Bird Generalist	Bulbul	64	1.2
2	Bird Generalist	Bulbul	53	1.5
3	Bird Generalist	Bulbul	614	1.5
3	Bird Generalist	Bulbul	192	1.7
3	Bird Generalist	Bulbul	562	1.3
3	Bird Generalist	Bulbul	133	1.7
3	Bird Generalist	Bulbul	46	1.6
3	Bird Generalist	Bulbul	358	1.1
3	Bird Generalist	Bulbul	162	1.5
3	Bird Generalist	Bulbul	212	1.6
3	Bird Generalist	Bulbul	149	1.8
3	Bird Generalist	Bulbul	12	0.8
3	Bird Generalist	Bulbul	154	1.7
3	Bird Generalist	Bulbul	134	1.8
3	Bird Generalist	Bulbul	238	1.6
3	Bird Generalist	Bulbul	72	1.8
3	Bird Generalist	Bulbul	483	1.4
3	Bird Generalist	Bulbul	29	1.5
3	Bird Generalist	Bulbul	221	1.7
4	Bird Generalist	Bulbul	40	1.9
4	Bird Generalist	Bulbul	34	1.8
4	Bird Generalist	Bulbul	8	1.7
4	Bird Generalist	Bulbul	15	1.3
5	Bird Generalist	Bulbul	281	1.4
5	Bird Generalist	Bulbul	6387	1.3
5	Bird Generalist	Bulbul	1581	1.5
5	Bird Generalist	Bulbul	1484	1.4
5	Bird Generalist	Bulbul	2308	1.4
5	Bird Generalist	Bulbul	927	1.5
5	Bird Generalist	Bulbul	471	1.4
5	Bird Generalist	Bulbul	520	1.3
5	Bird Generalist	Bulbul	926	1.4
5	Bird Generalist	Bulbul	259	NA
5	Bird Generalist	Bulbul	41	1.3
5	Bird Generalist	Bulbul	627	1.45
5	Bird Generalist	Bulbul	134	1.5
5	Bird Generalist	Bulbul	305	1.3
5	Bird Generalist	Bulbul	168	1.5
5	Bird Generalist	Bulbul	106	1.5
5	Bird Generalist	Bulbul	18	1.5
5	Bird Generalist	Bulbul	21	1.35
6	Bird Generalist	Bulbul	112	1.8
6	Bird Generalist	Bulbul	636	1.7
6	Bird Generalist	Bulbul	1091	1.8
6	Bird Generalist	Bulbul	1057	1.7
6	Bird Generalist	Bulbul	1455	1.7
6	Bird Generalist	Bulbul	586	1.6
6	Bird Generalist	Bulbul	78	1.7
6	Bird Generalist	Bulbul	357	1.9
7	Bird Generalist	Bulbul	351	NA
8	Bird Generalist	Bulbul	803	1.6
8	Bird Generalist	Bulbul	377	1.6
8	Bird Generalist	Bulbul	742	2.1
8	Bird Generalist	Bulbul	326	1.7
8	Bird Generalist	Bulbul	654	2
8	Bird Generalist	Bulbul	495	1.7
8	Bird Generalist	Bulbul	688	2
8	Bird Generalist	Bulbul	721	2
8	Bird Generalist	Bulbul	768	2
8	Bird Generalist	Bulbul	658	1.6
8	Bird Generalist	Bulbul	565	1.9
8	Bird Generalist	Bulbul	755	1.7
8	Bird Generalist	Bulbul	627	1.7
8	Bird Generalist	Bulbul	1001	1.7
8	Bird Generalist	Bulbul	455	1.6
8	Bird Generalist	Bulbul	590	2
8	Bird Generalist	Bulbul	693	1.7
8	Bird Generalist	Bulbul	691	1.9
8	Bird Generalist	Bulbul	503	1.5
9	Bird Generalist	Bulbul	475	1.8
9	Bird Generalist	Bulbul	519	1.4
9	Bird Generalist	Bulbul	356	1.6
9	Bird Generalist	Bulbul	490	1
9	Bird Generalist	Bulbul	690	1.9
9	Bird Generalist	Bulbul	764	1.3
9	Bird Generalist	Bulbul	1108	1.8
9	Bird Generalist	Bulbul	736	1.9
10	Bird Generalist	Bulbul	1024	1.7
10	Bird Generalist	Bulbul	954	1.8
10	Bird Generalist	Bulbul	729	1.5
10	Bird Generalist	Bulbul	912	1.5
10	Bird Generalist	Bulbul	396	1.2
11	Control	Control	203	1.7
11	Control	Control	271	1.6
11	Control	Control	366	1.7
11	Control	Control	276	1.4
12	Control	Control	200	0.8
12	Control	Control	653	0.4
13	Control	Control	476	2
13	Control	Control	194	2.5
13	Control	Control	291	2.2
14	Control	Control	33	1.8
14	Control	Control	27	2
14	Control	Control	50	2.3
14	Control	Control	735	2.2
14	Control	Control	27	2.1
14	Control	Control	155	2.1
14	Control	Control	16	1.8
14	Control	Control	475	2
14	Control	Control	63	2.2
14	Control	Control	17	1.8
15	Control	Control	688	2.1
15	Control	Control	55	2.1
15	Control	Control	522	1.7
16	Control	Control	117	1.7
16	Control	Control	357	1.3
16	Control	Control	52	1.7
16	Control	Control	405	1.6
17	Control	Control	228	1.6
17	Control	Control	264	1.4
18	Control	Control	201	NA
18	Control	Control	273	1.1
18	Control	Control	77	NA
18	Control	Control	123	1.7
19	Control	Control	67	2.1
19	Control	Control	93	2.1
19	Control	Control	88	2.3
20	Control	Control	109	NA
20	Control	Control	17	1.4
21	Control	Control	601	1.6
21	Control	Control	168	1.6
21	Control	Control	76	1.5
22	Control	Control	612	1.9
22	Control	Control	8	1.7
22	Control	Control	53	1.8
22	Control	Control	16	1.9
23	Control	Control	74	NA
24	Control	Control	311	1.7
24	Control	Control	273	1.9
24	Control	Control	43	2
24	Control	Control	151	1.6
24	Control	Control	129	1.4
24	Control	Control	14	2
25	Control	Control	172	NA
25	Control	Control	116	2.2
25	Control	Control	234	NA
25	Control	Control	19	NA
25	Control	Control	85	2.2
25	Control	Control	347	2.2
25	Control	Control	468	1.6
25	Control	Control	230	2.2
25	Control	Control	436	2.15
25	Control	Control	743	2.2
26	Control	Control	151	1.63
26	Control	Control	20	1.51
26	Control	Control	76	1.55
26	Control	Control	34	1.75
27	Control	Control	180	1.9
27	Control	Control	26	2
27	Control	Control	63	2.1
28	Control	Control	78	1.4
28	Control	Control	65	1.7
28	Control	Control	28	1.8
28	Control	Control	255	1.7
28	Control	Control	30	1.9
29	Control	Control	495	1.3
29	Control	Control	331	2
29	Control	Control	59	1.5
29	Control	Control	219	1.1
29	Control	Control	169	1.5
30	Control	Control	59	1.9
30	Control	Control	76	2
30	Control	Control	50	2
30	Control	Control	6	2.1
30	Control	Control	168	1.9
31	Bird Generalist	Glossy Starling	598	1.5
31	Bird Generalist	Glossy Starling	0	1.6
31	Bird Generalist	Glossy Starling	2	1.5
31	Bird Generalist	Glossy Starling	1120	NA
31	Bird Generalist	Glossy Starling	923	NA
31	Bird Generalist	Glossy Starling	0	NA
31	Bird Generalist	Glossy Starling	22	NA
31	Bird Generalist	Glossy Starling	82	NA
31	Bird Generalist	Glossy Starling	14	NA
31	Bird Generalist	Glossy Starling	4	NA
31	Bird Generalist	Glossy Starling	246	NA
32	Bird Generalist	Glossy Starling	49	1.5
32	Bird Generalist	Glossy Starling	315	1.6
32	Bird Generalist	Glossy Starling	529	1.3
32	Bird Generalist	Glossy Starling	14	2
32	Bird Generalist	Glossy Starling	181	1.9
32	Bird Generalist	Glossy Starling	189	1.5
33	Bird Generalist	Glossy Starling	1273	2.1
33	Bird Generalist	Glossy Starling	814	2.1
33	Bird Generalist	Glossy Starling	778	2.1
33	Bird Generalist	Glossy Starling	926	1.9
33	Bird Generalist	Glossy Starling	2169	2.4
33	Bird Generalist	Glossy Starling	1256	2.1
33	Bird Generalist	Glossy Starling	1872	2.2
33	Bird Generalist	Glossy Starling	1762	1.9
33	Bird Generalist	Glossy Starling	2019	2.1
33	Bird Generalist	Glossy Starling	178	2.2
33	Bird Generalist	Glossy Starling	487	2.2
33	Bird Generalist	Glossy Starling	653	1.9
33	Bird Generalist	Glossy Starling	593	2
33	Bird Generalist	Glossy Starling	2229	1.8
33	Bird Generalist	Glossy Starling	285	1.8
33	Bird Generalist	Glossy Starling	1446	2.3
33	Bird Generalist	Glossy Starling	785	2.1
33	Bird Generalist	Glossy Starling	595	2.1
33	Bird Generalist	Glossy Starling	996	2
33	Bird Generalist	Glossy Starling	826	2.2
33	Bird Generalist	Glossy Starling	695	2.1
33	Bird Generalist	Glossy Starling	1552	1.8
33	Bird Generalist	Glossy Starling	457	2
33	Bird Generalist	Glossy Starling	602	2.3
34	Bird Generalist	Glossy Starling	145	2
34	Bird Generalist	Glossy Starling	238	1.8
34	Bird Generalist	Glossy Starling	337	1.9
35	Bird Generalist	Glossy Starling	550	1.8
35	Bird Generalist	Glossy Starling	596	1.8
35	Bird Generalist	Glossy Starling	779	1.7
35	Bird Generalist	Glossy Starling	389	1.6
35	Bird Generalist	Glossy Starling	349	1.5
35	Bird Generalist	Glossy Starling	795	1.8
35	Bird Generalist	Glossy Starling	1700	1.7
35	Bird Generalist	Glossy Starling	250	1.6
35	Bird Generalist	Glossy Starling	1115	1.6
35	Bird Generalist	Glossy Starling	510	1.8
35	Bird Generalist	Glossy Starling	179	1.4
35	Bird Generalist	Glossy Starling	288	1.5
35	Bird Generalist	Glossy Starling	202	1.6
35	Bird Generalist	Glossy Starling	1053	1.6
36	Bird Generalist	Glossy Starling	218	1.7
36	Bird Generalist	Glossy Starling	813	1.4
36	Bird Generalist	Glossy Starling	1568	2
36	Bird Generalist	Glossy Starling	231	2
36	Bird Generalist	Glossy Starling	395	1.4
36	Bird Generalist	Glossy Starling	655	2
36	Bird Generalist	Glossy Starling	283	1.6
36	Bird Generalist	Glossy Starling	271	2
36	Bird Generalist	Glossy Starling	590	NA
36	Bird Generalist	Glossy Starling	387	2
36	Bird Generalist	Glossy Starling	336	1.2
37	HB	HB	185	NA
38	HB	HB	343	1.7
39	HB	HB	109	1.6
40	HB	HB	635	1.8
41	HB	HB	16	1.9
42	HB	HB	15	1.5
43	HB	HB	793	2.5
44	HB	HB	1222	2.2
46	HB	HB	30	2.3
47	HB	HB	768	1.9
48	HB	HB	291	2
49	HB	HB	361	2
50	HB	HB	77	2
51	HB	HB	122	1.9
52	HB	HB	123	2.1
53	HB	HB	199	2.3
54	HB	HB	41	2.1
55	HB	HB	152	2.1
56	HB	HB	1454	2.2
57	HB	HB	631	2.3
58	HB	HB	469	2.2
59	HB	HB	524	1.9
60	HB	HB	253	2.2
61	HB	HB	51	2.2
62	HB	HB	514	2.2
63	HB	HB	81	2.4
64	HB	HB	145	2.2
65	HB	HB	263	2.2
66	HB	HB	171	2
67	HB	HB	120	1.8
68	HB	HB	139	2.1
69	HB	HB	37	2.1
70	HB	HB	279	2
71	HB	HB	160	2.2
72	HB	HB	522	2.3
73	HB	HB	191	2.1
74	HB	HB	961	2.1
75	HB	HB	71	NA
76	HB	HB	1309	2.1
77	HB	HB	28	1.9
78	HB	HB	240	1.9
79	HB	HB	317	NA
80	HB	HB	118	1.9
81	HB	HB	27	NA
82	HB	HB	24	2
83	HB	HB	57	2.1
84	HB	HB	92	1.1
85	HB	HB	46	2.1
86	HB	HB	800	2.1
87	HB	HB	58	1.8
88	HB	HB	387	2.1
89	HB	HB	146	2
90	HB	HB	272	2.3
91	HB	HB	31	2.2
92	HB	HB	735	2
93	HB	HB	607	1.8
94	HB	HB	264	2
95	HB	HB	735	1.7
96	HB	HB	846	NA
97	HB	HB	618	1.9
98	HB	HB	235	2
99	HB	HB	468	2.2
100	HB	HB	503	1.9
101	HB	HB	412	1.8
102	HB	HB	1979	1.9
103	HB	HB	713	NA
104	HB	HB	1229	1.9
105	HB	HB	886	2
106	HB	HB	142	1.75
107	HB	HB	135	1.69
108	HB	HB	228	1.73
109	HB	HB	425	1.82
110	HB	HB	541	1.81
111	HB	HB	58	1.81
112	HB	HB	69	1.65
113	HB	HB	83	1.61
114	HB	HB	346	1.76
115	HB	HB	90	1.45
116	HB	HB	56	1.72
117	HB	HB	253	1.78
118	HB	HB	33	1.8
119	HB	HB	110	1.46
120	HB	HB	25	1.76
121	HB	HB	134	NA
122	HB	HB	221	1.42
123	HB	HB	55	1.61
124	HB	HB	159	1.7
125	HB	HB	74	1.56
126	HB	HB	183	1.9
127	HB	HB	296	NA
128	HB	HB	198	NA
129	HB	HB	94	NA
130	HB	HB	265	NA
131	HB	HB	149	NA
132	HB	HB	103	NA
133	Bird Specialist	Sunbird	248	1.6
133	Bird Specialist	Sunbird	23	1.6
133	Bird Specialist	Sunbird	106	1.6
134	Bird Specialist	Sunbird	486	1.5
134	Bird Specialist	Sunbird	459	1.8
134	Bird Specialist	Sunbird	176	1
134	Bird Specialist	Sunbird	31	0.9
134	Bird Specialist	Sunbird	227	1.5
134	Bird Specialist	Sunbird	367	1
134	Bird Specialist	Sunbird	55	1.6
134	Bird Specialist	Sunbird	176	1.6
134	Bird Specialist	Sunbird	51	1.8
134	Bird Specialist	Sunbird	33	1.7
134	Bird Specialist	Sunbird	76	1.8
134	Bird Specialist	Sunbird	159	1.6
135	Bird Specialist	Sunbird	183	1.9
135	Bird Specialist	Sunbird	134	1.9
136	Bird Specialist	Sunbird	329	1.9
136	Bird Specialist	Sunbird	228	1.4
136	Bird Specialist	Sunbird	550	1.7
136	Bird Specialist	Sunbird	353	1.9
136	Bird Specialist	Sunbird	101	1.3
136	Bird Specialist	Sunbird	88	1.8
136	Bird Specialist	Sunbird	251	2
137	Bird Generalist	Weaver	128	1.4
137	Bird Generalist	Weaver	82	0.5
137	Bird Generalist	Weaver	403	0.5
137	Bird Generalist	Weaver	149	1
137	Bird Generalist	Weaver	250	0.7
138	Bird Generalist	Weaver	824	1.7
138	Bird Generalist	Weaver	458	1.8
138	Bird Generalist	Weaver	258	1.8
138	Bird Generalist	Weaver	146	1.8
139	Bird Generalist	Weaver	407	1.8
139	Bird Generalist	Weaver	1501	1.6
139	Bird Generalist	Weaver	1712	1.9
139	Bird Generalist	Weaver	761	1.5
139	Bird Generalist	Weaver	179	1.8
139	Bird Generalist	Weaver	495	1.8
139	Bird Generalist	Weaver	725	1.8
139	Bird Generalist	Weaver	1251	1.9
139	Bird Generalist	Weaver	705	1.9
139	Bird Generalist	Weaver	1059	1.7
139	Bird Generalist	Weaver	312	1.6
139	Bird Generalist	Weaver	542	1.9
139	Bird Generalist	Weaver	147	1.5
140	Bird Generalist	Weaver	141	2
140	Bird Generalist	Weaver	520	2
140	Bird Generalist	Weaver	1022	1.6
140	Bird Generalist	Weaver	266	1.4
140	Bird Generalist	Weaver	1142	1.9
140	Bird Generalist	Weaver	504	1.9
140	Bird Generalist	Weaver	848	2
140	Bird Generalist	Weaver	909	1.4
140	Bird Generalist	Weaver	147	2.2
140	Bird Generalist	Weaver	193	2.2
140	Bird Generalist	Weaver	125	1.6
140	Bird Generalist	Weaver	116	2.1
140	Bird Generalist	Weaver	909	1.9
140	Bird Generalist	Weaver	479	NA
140	Bird Generalist	Weaver	238	2
141	Bird Generalist	Weaver	481	1.5
141	Bird Generalist	Weaver	510	1.7
141	Bird Generalist	Weaver	63	1.4
141	Bird Generalist	Weaver	119	1.6
141	Bird Generalist	Weaver	239	1.8
141	Bird Generalist	Weaver	447	1.5
141	Bird Generalist	Weaver	40	1.3
141	Bird Generalist	Weaver	1175	NA
